# Supplementary material
Source: MDPI journal article supplement (https://www.mdpi.com/2072-4292/11/2/154)
Supplement: s1 [file s1]

Article

# Determining Regional-Scale Groundwater Recharge with GRACE and GLDAS

Qifan Wu <sup>1</sup>, Bingcheng Si <sup>1,2,\*</sup>, Hailong He <sup>1\*</sup> and Pute Wu <sup>1</sup>

<sup>1</sup> Key Laboratory of Agricultural Soil and Water Engineering in Arid and Semiarid Areas, Ministry of Education, Northwest A&F University, Yangling, 712100, China; wuqifan@nwfau.edu.cn (Q.W.); gjzwpt@vip.sina.com (P.W.)

<sup>2</sup> Department of Soil Science, University of Saskatchewan, Saskatoon, Canada

\* Correspondence: bing.si@usask.ca (B.S.); hailong.he@nwfau.edu.cn (H.H.)

Received: 10 November 2018; Accepted: 11 January 2019; Published: date

**Abstract:** Groundwater recharge (GR) is a key component of regional and global water cycles and is a critical flux for water resource management. However, recharge estimates are difficult to obtain at regional scales due to the lack of an accurate measurement method. Here, we estimate GR using Gravity Recovery and Climate Experiment (GRACE) and Global Land Data Assimilation System (GLDAS) data. The regional-scale GR rate is calculated based on the groundwater storage fluctuation, which is, in turn, calculated from the difference between GRACE and root zone soil water storage from GLDAS data. We estimated GR in the Ordos Basin of the Chinese Loess Plateau from 2002 to 2012. There was no obvious long-term trend in GR, but the annual recharge varies greatly from 30.8 to 66.5 mm yr<sup>-1</sup>, 42% of which can be explained by the variability in the annual precipitation. The average GR rate over the 11-year period from GRACE data was 48.3 mm yr<sup>-1</sup>, which did not differ significantly from the long-term average recharge estimate of 39.9 mm yr<sup>-1</sup> from the environmental tracer methods and one-dimensional models. Moreover, the standard deviation of the 11-year average GR is 16.0 mm yr<sup>-1</sup>, with a coefficient of variation (CV) of 33.1%, which is, in most cases, comparable to or smaller than estimates from other GR methods. The improved method could provide critically needed, regional-scale GR estimates for groundwater management and may eventually lead to a sustainable use of groundwater resources.

**Keywords:** Water table fluctuation; Water storage fluctuation; Loess Plateau; Ordos Basin; Interannual groundwater recharge; GRACE

**Table 1.** The annual water storage variations in Wanjiazhai reservoirs on the Loess Plateau in 2003-2016, Data based on the Yellow River Water Resources Bulletin (<http://www.yellowriver.gov.cn/other/hhgb/>).

| Year | Water Storage Variable ( $10^8\text{m}^3$ ) | Water Equivalent (mm) |
|------|---------------------------------------------|-----------------------|
| 2003 | 0.65                                        | 0.20                  |
| 2004 | -0.94                                       | -0.29                 |
| 2005 | -1.11                                       | -0.35                 |
| 2006 | 1.70                                        | 0.53                  |
| 2007 | 0.25                                        | 0.08                  |
| 2008 | -0.94                                       | -0.29                 |
| 2009 | 0.03                                        | 0.01                  |
| 2010 | -1.09                                       | -0.34                 |
| 2011 | -0.18                                       | -0.06                 |
| 2012 | 1.36                                        | 0.43                  |
| 2013 | -0.36                                       | -0.11                 |
| 2014 | 0.52                                        | 0.16                  |
| 2015 | -1.42                                       | -0.44                 |

**Table 2.** Table S2: Annual sediment runoff records at Tongguan hydrological station with a drainage area 680000 km<sup>2</sup>, Data based on the Yellow River Sediment Bulletin (<http://www.yellowriver.gov.cn/nishagonggao/>).

| Year | Sediment Runoff ( $10^8\text{t}$ ) | Water Equivalent (mm) |
|------|------------------------------------|-----------------------|
| 2006 | 2.47                               | 0.36                  |
| 2007 | 2.50                               | 0.37                  |
| 2008 | 1.30                               | 0.19                  |
| 2009 | 1.10                               | 0.16                  |
| 2010 | 1.30                               | 0.19                  |
| 2011 | 1.30                               | 0.19                  |
| 2012 | 2.10                               | 0.31                  |
| 2013 | 3.00                               | 0.44                  |
| 2014 | 0.70                               | 0.10                  |
| 2015 | 0.60                               | 0.09                  |
| 2016 | 1.10                               | 0.16                  |

**Table 3.** Statistics of precipitation, TWSA, SWSA, GWSA from 2002 to 2012 in the Ordos Basin.

|      | Precipitation ( $\text{mm yr}^{-1}$ ) | TWSA (mm) | SWSA (mm) | GWSA (mm) |
|------|---------------------------------------|-----------|-----------|-----------|
| Min  | 346.3                                 | -107.10   | -41.4     | -108.7    |
| Max  | 585.6                                 | 126.40    | 77.7      | 71.3      |
| Mean | 472.1                                 | -2.11     | -0.92     | -2.11     |
| Std  | 70.2                                  | 37.00     | 21.5      | 33.70     |

**Table 4.** The month of peak TWSA, SWSA, and GWSA in each year and the decline period of GWSA.

| Year | TWSA | SWSA | GWSA | Decline Period of GWSA |
|------|------|------|------|------------------------|
| 2002 | 9    | 7    | 3*   | 6 to 10                |
| 2003 | 11   | 10   | 11   | 4 to 7                 |
| 2004 | 11   | 9    | 11   | 12* to 6               |
| 2005 | 11   | 10   | 3*   | 12* to 7               |
| 2006 | 9    | 9    | 3*   | 4 to 9                 |
| 2007 | 10   | 10   | 4*   | 4 to 9                 |
| 2008 | 10   | 10   | 3*   | 5 to 9                 |
| 2009 | 9    | 9    | 2*   | 4 to 9                 |
| 2010 | 9    | 9    | 2*   | 3 to 8                 |
| 2011 | 12   | 11   | 5*   | 3 to 10                |
| 2012 | 9    | 9    | 2*   | 6 to 9                 |
| Mean | 10   | 9.4  | 2.1* | 3.3 to 8.4             |

\* represent the month in the next year. '\*' represent the month in the next year.

**Table 5.** Groundwater recharge estimated via method of Henry et al. (2011) and our method.

| Year | Net Recharge or Amplitude of GWSA (mm yr <sup>-1</sup> ) | Recharge of This Study (mm yr <sup>-1</sup> ) |
|------|----------------------------------------------------------|-----------------------------------------------|
| 2002 | 9.6                                                      | 37.3                                          |
| 2003 | 50.8                                                     | 64.2                                          |
| 2004 | 45.3                                                     | 66.5                                          |
| 2005 | 19.7                                                     | 32.8                                          |
| 2006 | 10.8                                                     | 30.8                                          |
| 2007 | 26.7                                                     | 50.8                                          |
| 2008 | 27.6                                                     | 47.7                                          |
| 2009 | 24.7                                                     | 59.7                                          |
| 2010 | 25.4                                                     | 37.6                                          |
| 2011 | 46.7                                                     | 56.6                                          |
| 2012 | 23.7                                                     | 47.3                                          |
| Mean | 28.3                                                     | 48.3                                          |

Note: Net recharge or Amplitude of GWSA is the ground water recharge estimated from the method of Henry et al. (2011).

**Table 6.** Groundwater recharge in the Ordos Basin estimated with different methods from different studies [47,50,126,51–55,57,105,125].

| Location       | Topographic      | Land Use                           | Method         | R (mm yr <sup>-1</sup> ) | Reference |
|----------------|------------------|------------------------------------|----------------|--------------------------|-----------|
| Guyuan         | Terrace region   | Natural sparse small grass         | CMB            | 100                      |           |
| Guyuan         | Terrace region   | Winter wheat                       | CMB            | 55                       | [50]      |
| Xifeng         | Loess Plain      | Apple orchard 7 years              | CMB            | 33                       |           |
| Ansai          | Terrace          | Cultivated terrace                 | CMB            | 43                       |           |
| Ansai          | Gulley           | Cultivated behind check-dam        | CMB            | 67                       |           |
| Ansai          | Hillslope        | Tree plantation                    | CMB            | 56                       | [51]      |
| Ansai          | Hillslope        | Shrub plantation                   | CMB            | 92                       |           |
| Ansai          | Hillslope        | Natural forest                     | CMB            | 19                       |           |
| Etuokeqi       | Plain            |                                    | CMB            | 11.7                     |           |
| Duguitala town | Plain            |                                    | CMB            | 6.6                      |           |
| Ordos city     | Plain            |                                    | CMB            | 5.2                      | [52]      |
| Yulin city     | Plain            |                                    | CMB            | 10.1                     |           |
| Yan'an city    | Plain            |                                    | CMB            | 12.3                     |           |
| Weinan city    | Plain            |                                    | CMB            | 17.2                     |           |
| zhengning      | Loess-tableland  | Farm land                          | CMB            | 55-71                    | [53]      |
| Luochuan       | Loess-plain      | Wheat/maize                        | Cl-peak        | 39-44                    |           |
| Luochuan       | Loess-plain      | 20-year apple orchard              | Cl-peak        | 36-40                    |           |
| Luochuan       | Loess-plain      | 30-year apple orchard and then cut | Cl-peak        | 59-67                    |           |
| Luochuan       | Loess-plain      | Wheat/maize                        | CMB            | 47                       |           |
| Luochuan       | Loess-plain      | 20-year apple orchard              | CMB            | 42                       | [47]      |
| Luochuan       | Loess-plain      | 30-year apple orchard and then cut | CMB            | 65                       |           |
| Luochuan       | Loess-plain      | Wheat/maize                        | Nitrate-peak   | 38                       |           |
| Luochuan       | Loess-plain      | 20-year apple orchard              | Nitrate-peak   | 38                       |           |
| Luochuan       | Loess-plain      | 30-year apple orchard and then cut | Nitrate-peak   | 46                       |           |
| Luochuan       |                  | Wheat                              | model          | 17                       | [125]     |
| Changwu        | Table land       | Apple orchard                      | model          | 9.3                      | [126]     |
| Changwu        | Table land       | Winter wheat                       | model          | 18.3                     |           |
| Changwu        | Upper hillslope  | Grass                              | <sup>3</sup> H | 20                       |           |
| Changwu        | Middle hillslope | Grass                              | <sup>3</sup> H | 22                       | [57]      |
| Changwu        | Lower hillslope  | Grass                              | <sup>3</sup> H | 27                       |           |
| Changwu        | Upper hillslope  | Grass                              | <sup>3</sup> H | 33.7                     |           |
| Changwu        | Middle hillslope | Grass                              | <sup>3</sup> H | 34.1                     |           |
| Changwu        | Lower hillslope  | Grass                              | <sup>3</sup> H | 38.2                     |           |

|                     |            |                |                |      |                  |
|---------------------|------------|----------------|----------------|------|------------------|
| Changwu             | Table land | Maize          | <sup>3</sup> H | 33.1 |                  |
| Changwu             | Table land | Wheat          | <sup>3</sup> H | 38.6 |                  |
| Qingjian            | Hillslope  | 7-year jujube  | <sup>3</sup> H | 33.8 |                  |
| Qingjian            | Hillslope  | 16-year jujube | <sup>3</sup> H | 39.7 | Unpublished data |
| Qingjian            | Hillslope  | 7-year grass   | <sup>3</sup> H | 31.6 |                  |
| Qingjian            | Hillslope  | 16-year grass  | <sup>3</sup> H | 37.3 |                  |
| Yanan               | Hillslope  | Apple orchard  | <sup>3</sup> H | 65   |                  |
| Pengyang            | Table land | Maize          | <sup>3</sup> H | 51.2 |                  |
| Pengyang            | Valley     | Millet         | <sup>3</sup> H | 30.9 |                  |
| Pingding            | Plain      | Maize          | <sup>3</sup> H | 64.2 |                  |
| Pingding            | Plain      | Maize          | <sup>3</sup> H | 73.1 |                  |
| Pingding            | Plain      | Maize          | <sup>3</sup> H | 71.3 |                  |
| Pingding            | Plain      | Maize          | <sup>3</sup> H | 50.0 |                  |
| Pingding            | Plain      | Maize          | <sup>3</sup> H | 70.1 |                  |
| Pingding            | Plain      | Framland       | <sup>3</sup> H | 68   | [105]            |
| Western Ordos Basin | Plain      | Grass          | CMB            | 0.17 |                  |
| Western Ordos Basin | Plain      | Grass          | CMB            | 3.26 |                  |
| Western Ordos Basin | Plain      | Grass          | CMB            | 0.11 |                  |
| Western Ordos Basin | Plain      | Grass          | CMB            | 0.18 | [54]             |
| Western Ordos Basin | Plain      | Grass          | CMB            | 0.22 |                  |
| Western Ordos Basin | Plain      | Grass          | CMB            | 0.3  |                  |
| Western Ordos Basin | Plain      | Grass          | CMB            | 0.32 |                  |
| Wulanmu             |            |                | UD             | 68   |                  |
| Subei               |            |                | UD             | 97   |                  |
| Wuding              |            |                | UD             | 110  |                  |
| Muolin              |            |                | UD             | 47   |                  |
| Yanhaizi            |            |                | UD             | 54   | [57]             |
| Taoli               |            |                | UD             | 36   |                  |
| Dosit               |            |                | UD             | 48   |                  |
| Damiao              |            |                | UD             | 33   |                  |
| Yanchi              |            |                | UD             | 80   |                  |

Note: CMB is Chloride Mass Balance method; UD is Unsaturated-zone Darcian method; <sup>3</sup>H is the tritium peak method; model is method using Hydrus-1D; Cl-peak, Nitrate-peak is Chloride peak method and Nitrate peak method, respectively.
